# Supplementary material for: Open Inertia Modelling (OpInMod) - An Open Source Approach to Model Economic Inertia Dispatch in Power Systems
Source: Preprints.org preprint supplement (doi:10.20944/preprints202201.0419.v1), 2022-01-27
Supplement: Supplementary file 3 [file supplementary]

Example 1

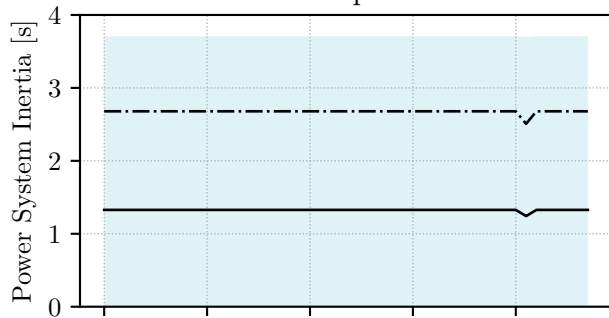

Example 2

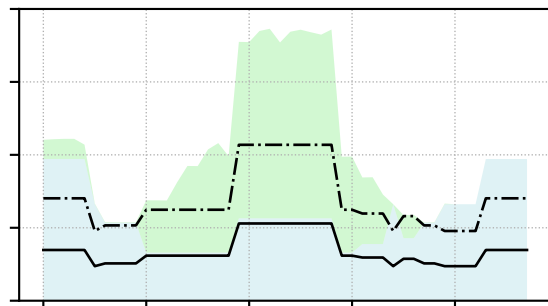

Example 3

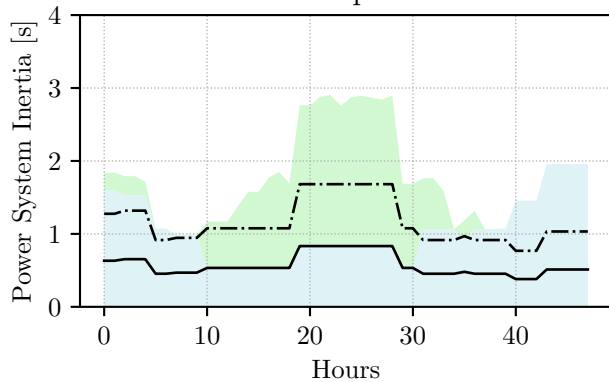

Example 4

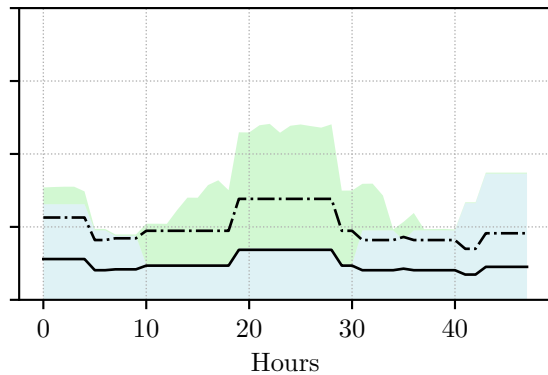

— Min Sync. Inertia    - - - Min Inertia    Synchronous Inertia    Synthetic Inertia
