# Supplementary figures and images for: Open Inertia Modelling (OpInMod) - An Open Source Approach to Model Economic Inertia Dispatch in Power Systems
Source: Preprints.org preprint supplement (doi:10.20944/preprints202201.0419.v1), 2022-01-27

Example 1

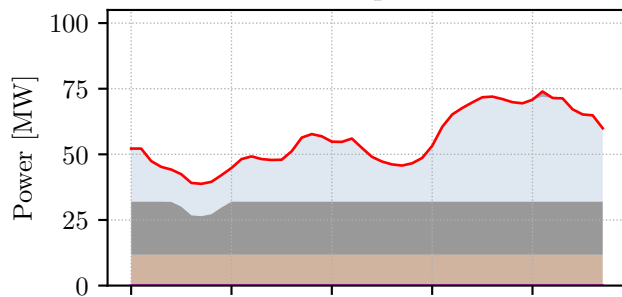

Example 2

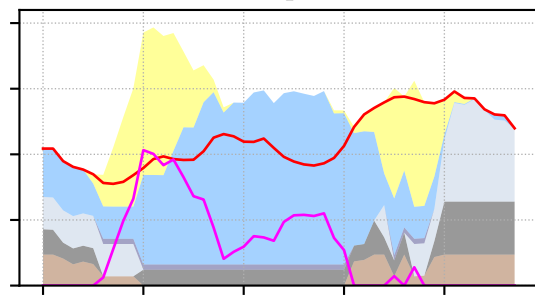

Example 3

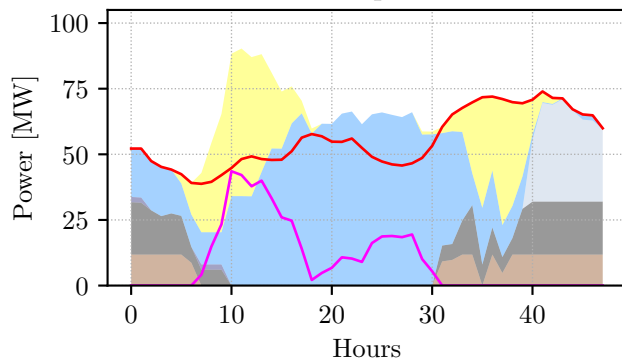

Example 4

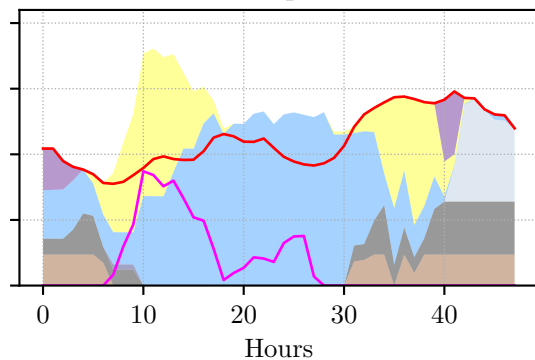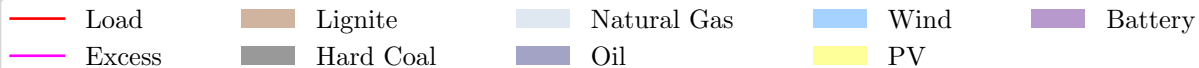

Supplement: Supplementary file 1 [file supplementary]

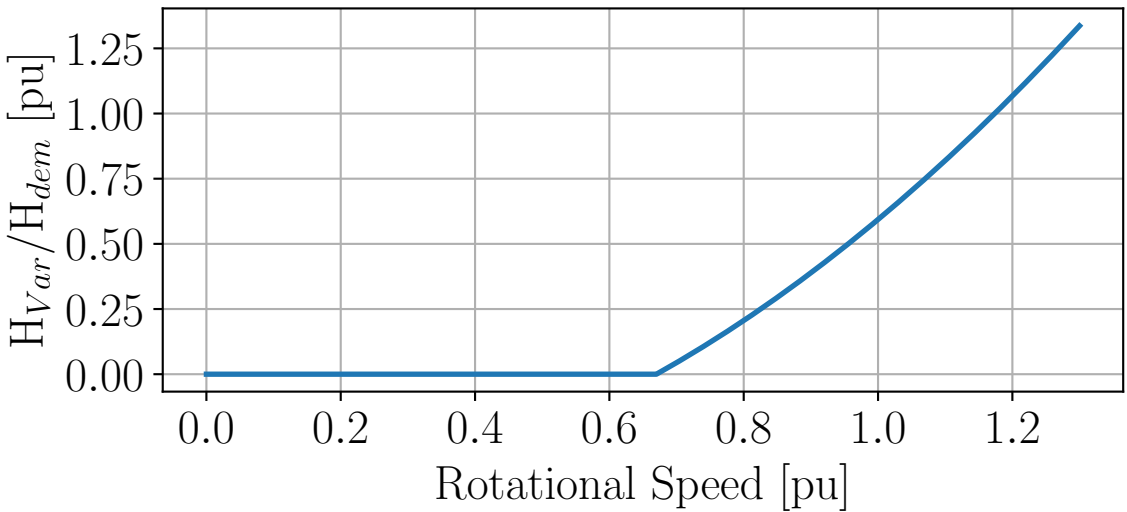

Supplement: Supplementary file 2 [file supplementary]

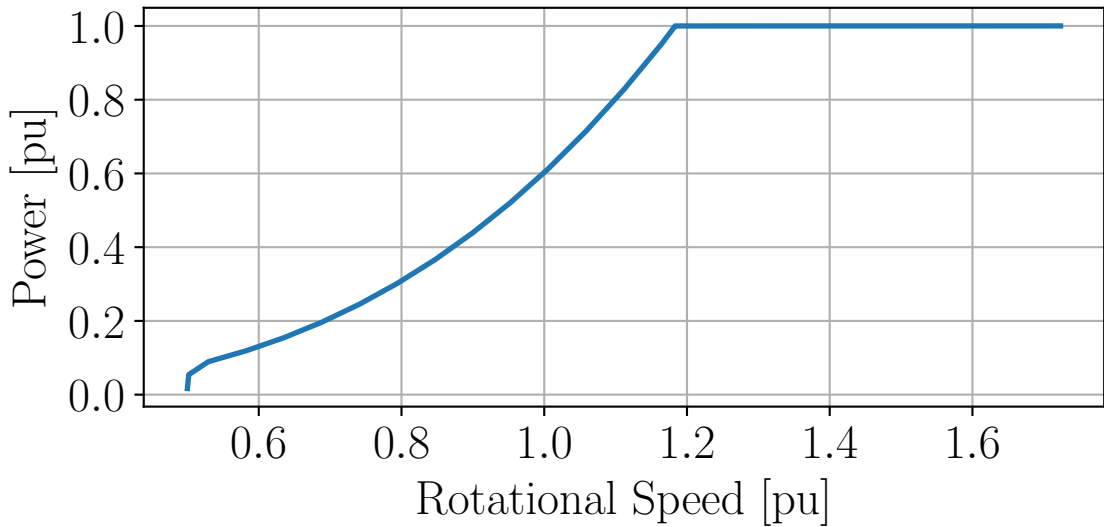

Supplement: Supplementary file 4 [file supplementary]
